# Supplementary material for: Antioxidant Assessment of Prenylated Stilbenoid-Rich Extracts from Elicited Hairy Root Cultures of Three Cultivars of Peanut (Arachis hypogaea)
Source: MDPI journal article supplement (doi:10.3390/molecules26226778), 2021-11-10
Supplement: s1 [file s1]

## Supporting Information

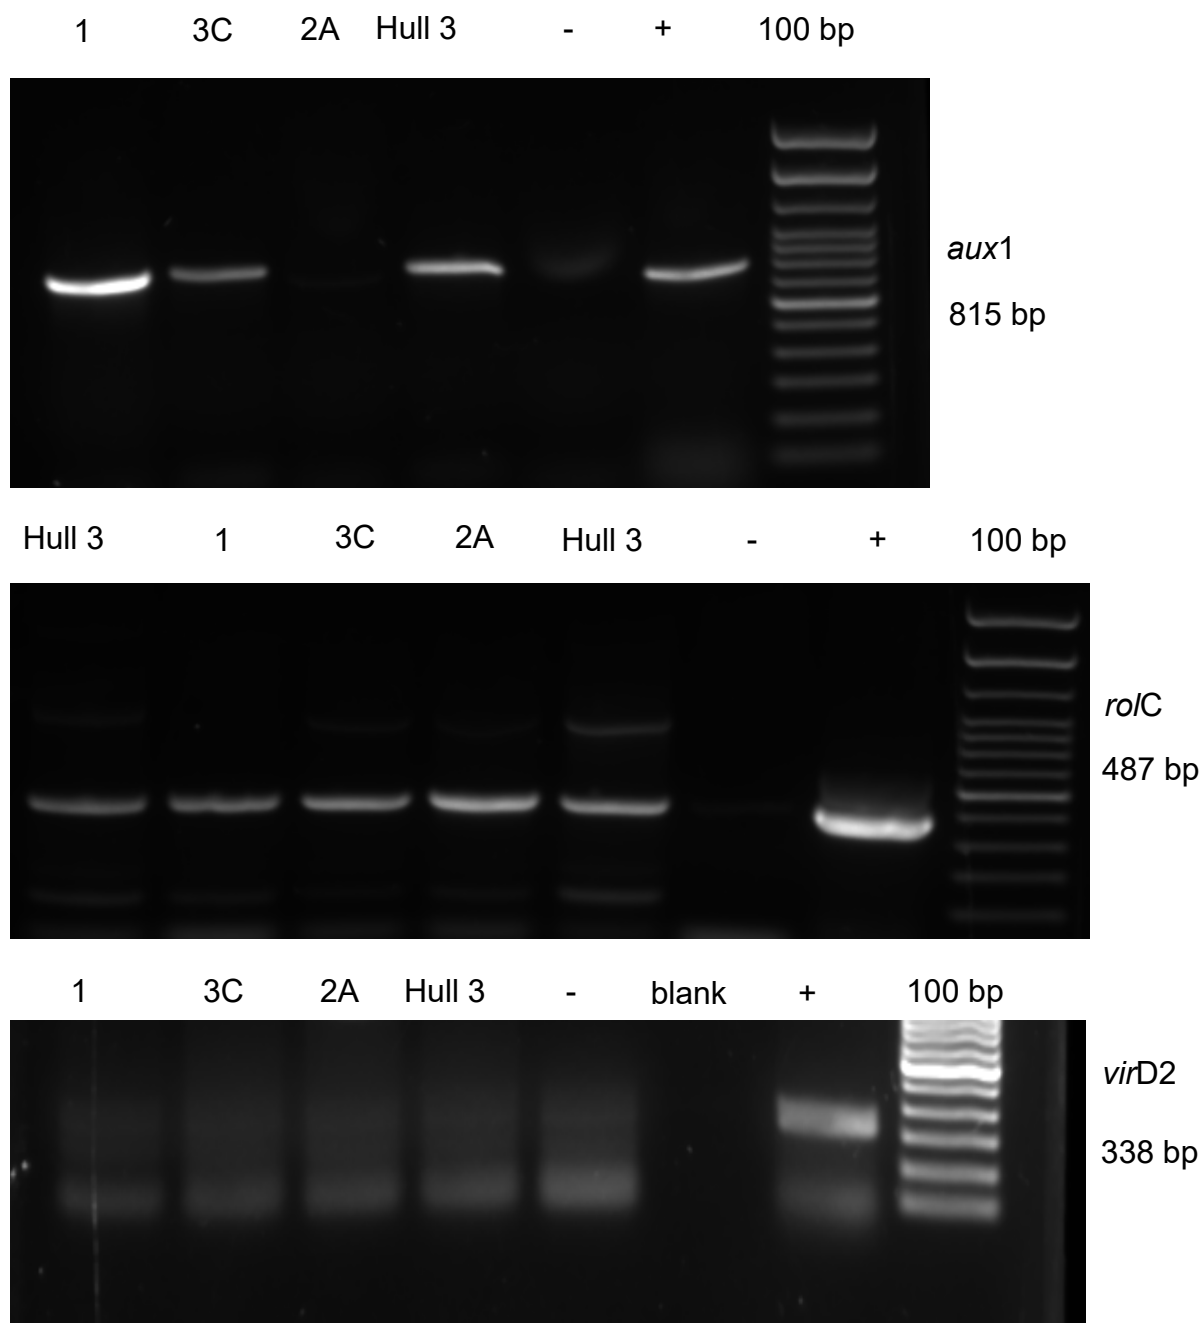

**Figure S1.** Molecular analysis by PCR of hairy roots of peanut cv. Tifrunner (lines 1, 3C and 2A) and Hull (line 3). Primers targeting the *rolC*, *aux1*, and *virD2* genes were used. Plasmid pRi15834 was used as positive control and ddH<sub>2</sub>O was used as negative control;

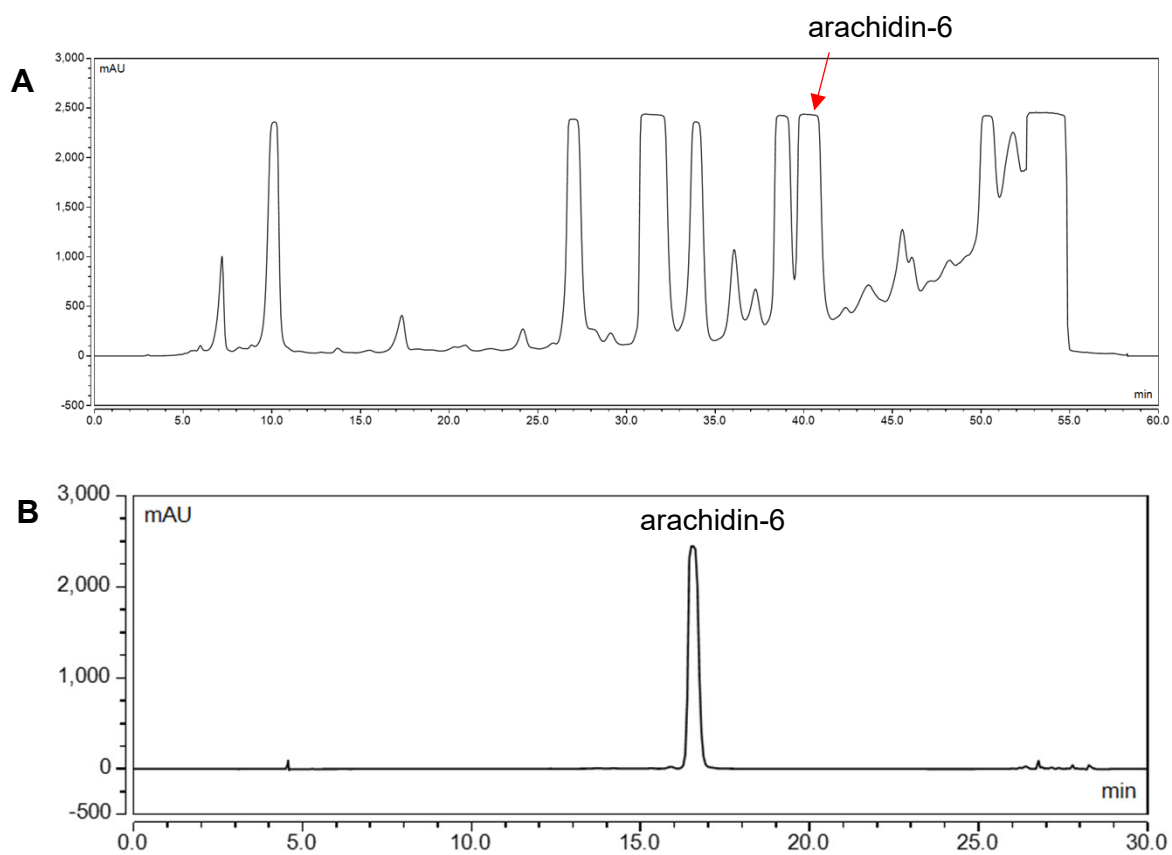

**Figure S2.** Purification of arachidin-6. (A) semi-preparative HPLC chromatogram of ethyl acetate extract of peanut cv. Tifrunner (B) HPLC profile of purified arachidin-6.

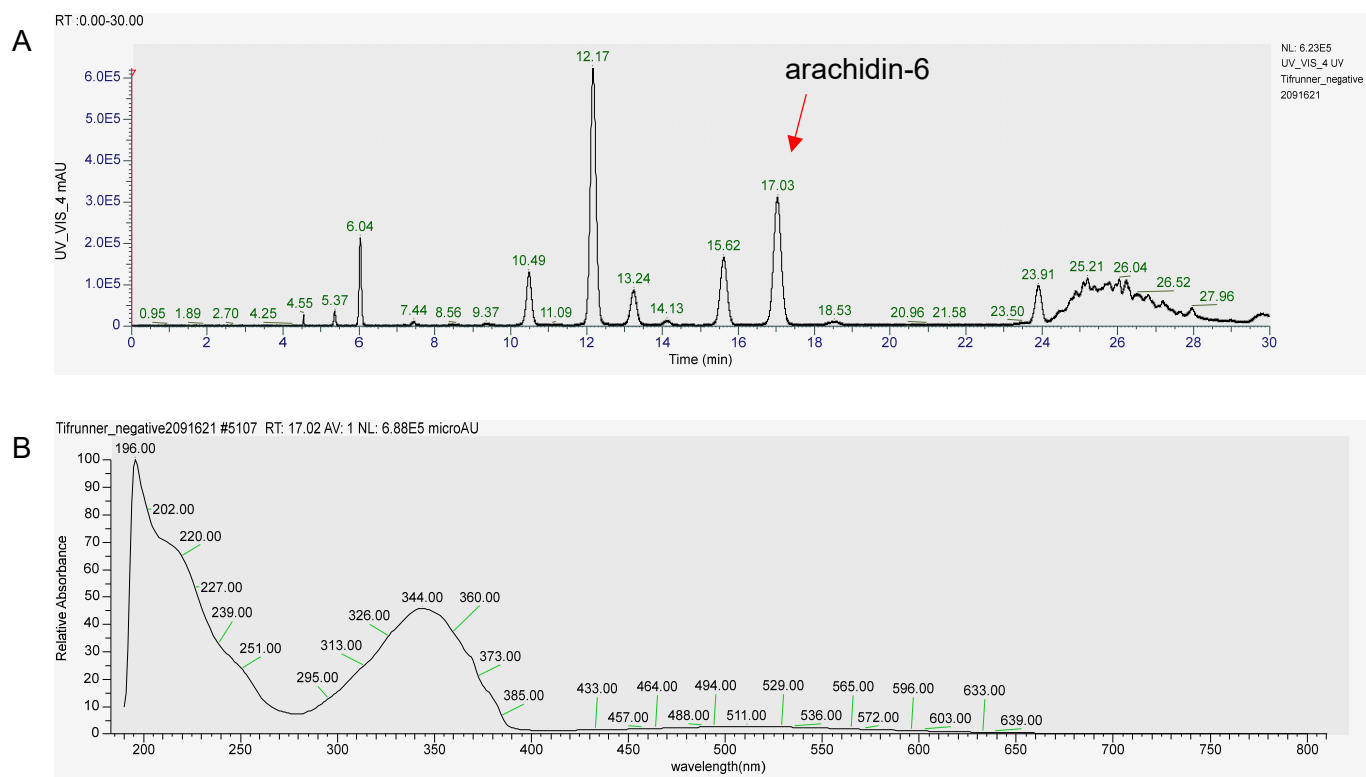

**Figure S3. Characterization of arachidin-6.** (A) HPLC profile of ethyl acetate extract of peanut cv. Tifrunner (B) UV spectrum of arachidin-6.

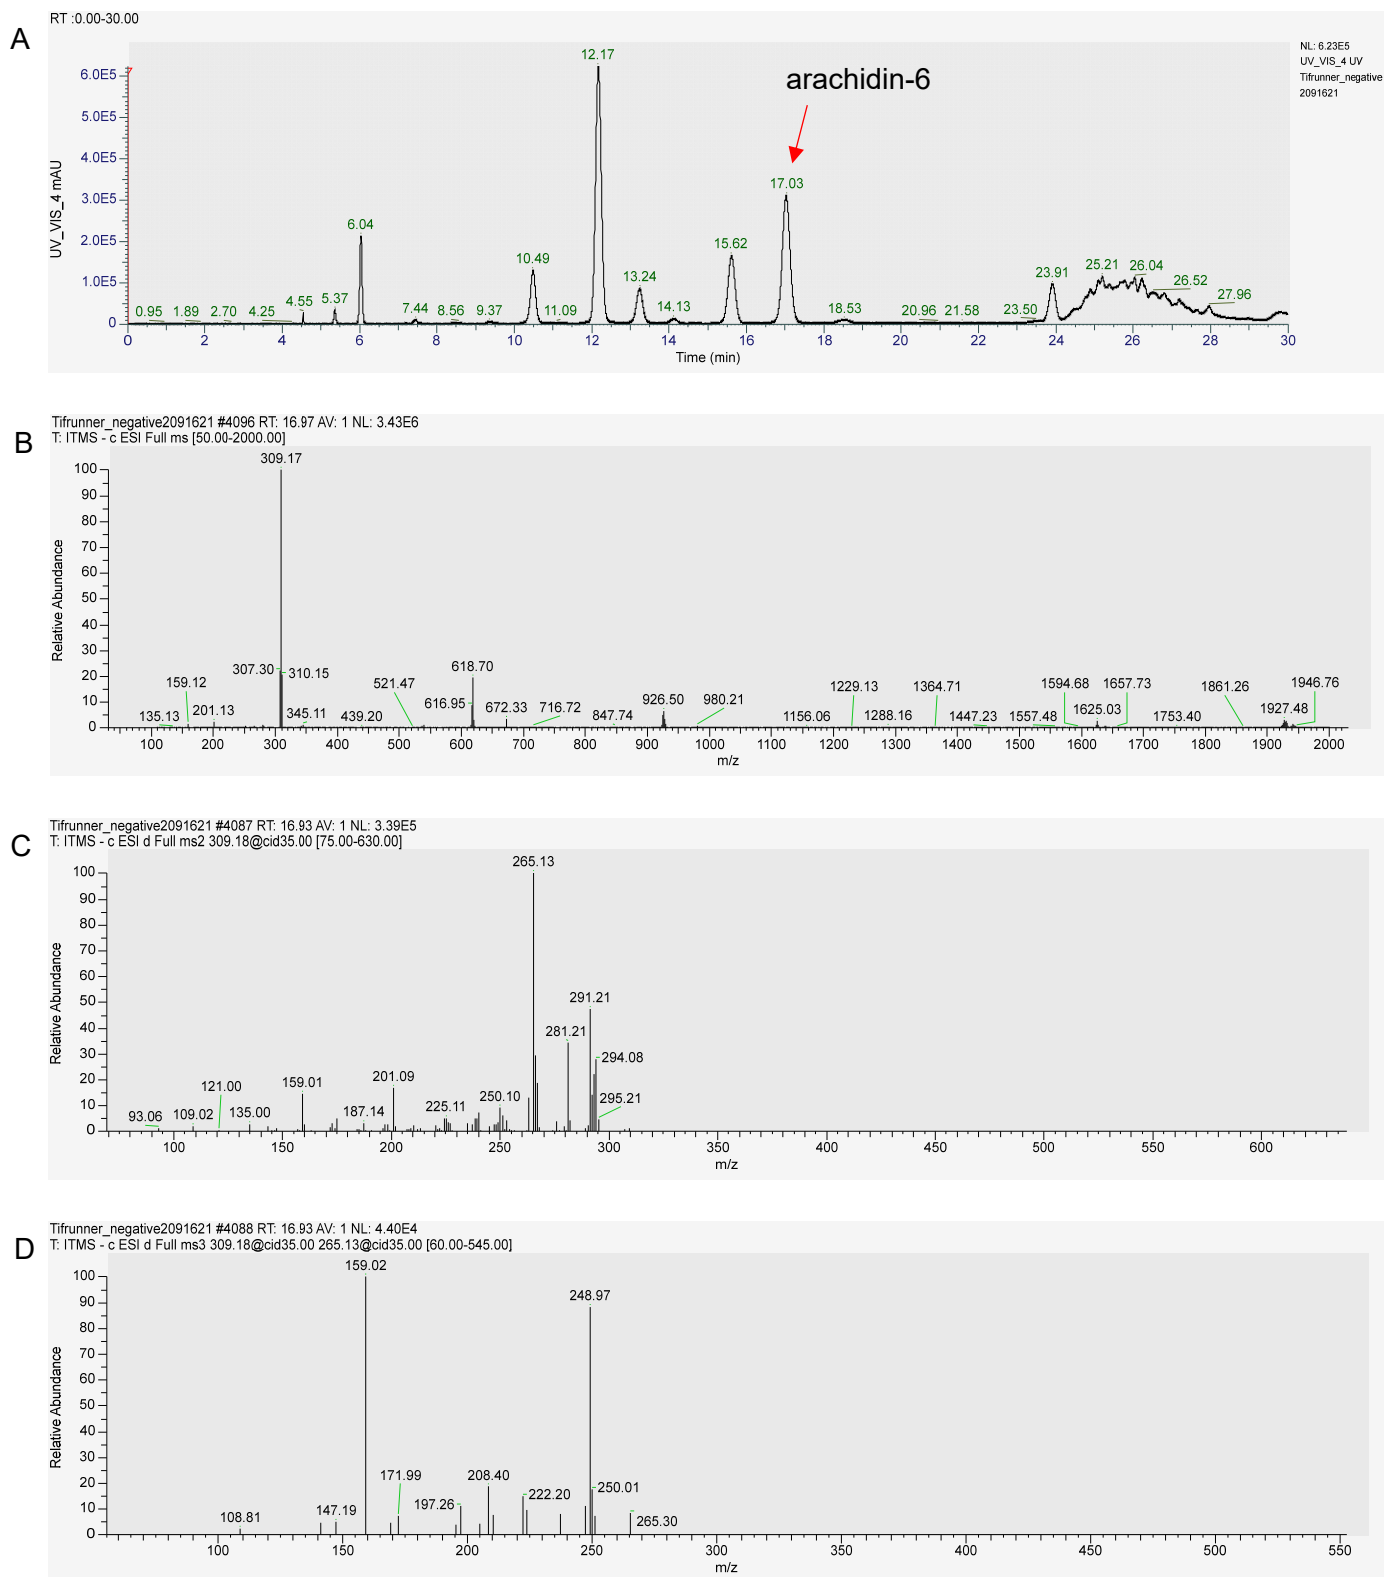

**Figure S4.** LC-MS analysis of arachidin-6 under negative mode. (A) HPLC chromatogram of ethyl acetate extract of peanut cv. Tifrunner; (B) MS ion chromatogram; (C) MS<sup>2</sup> ion chromatogram; (D) MS<sup>3</sup> ion chromatogram.

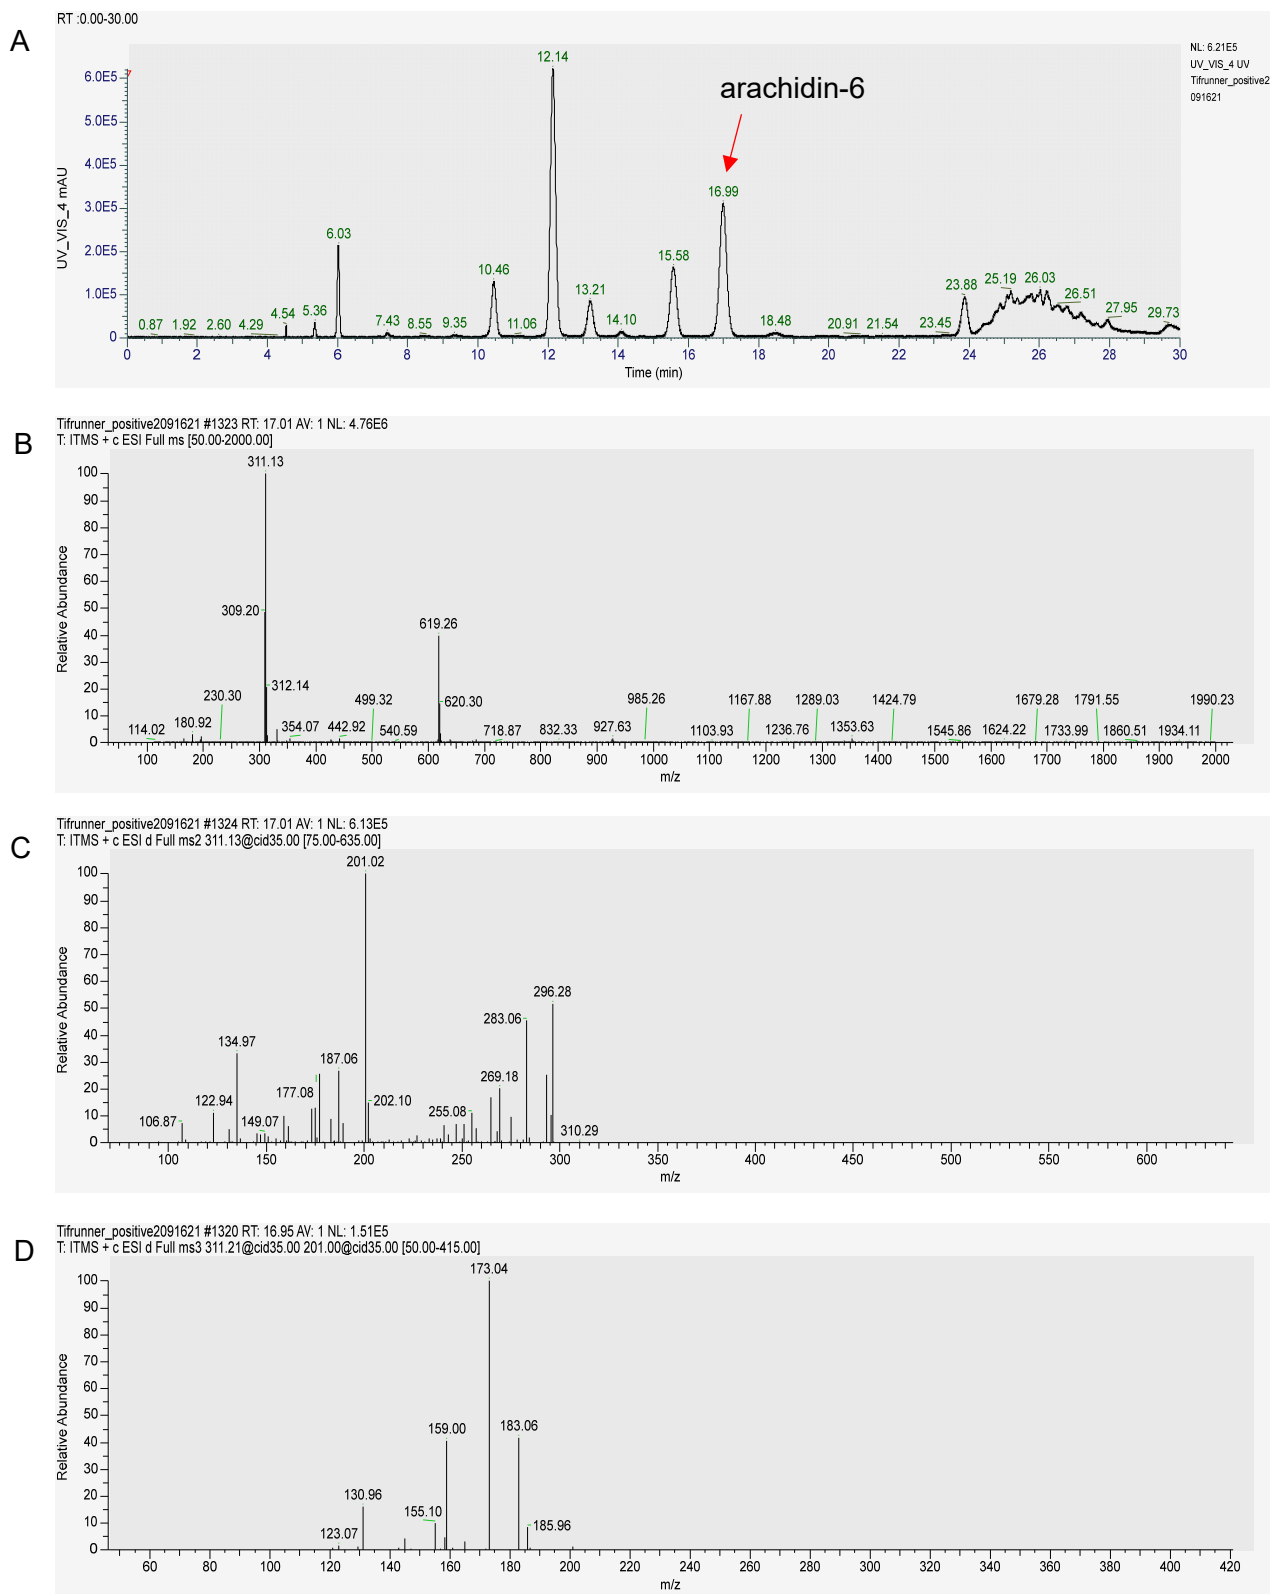

**Figure S5.** LC-MS analysis of arachidin-6 under positive mode. (A) HPLC chromatogram of ethyl acetate extract of peanut cv. Tifrunner; (B) MS ion chromatogram; (C) MS<sup>2</sup> ion chromatogram; (D) MS<sup>3</sup> ion chromatogram.
